# Supplementary material for: Study of the Phenolic Compound Profile of Arbutus unedo L. Fruits at Different Ripening Stages by HPLC-TQ-MS/MS
Source: MDPI journal article supplement (doi:10.3390/app112411616), 2021-12-07
Supplement: s1 [file s1]

Archive with 1 entries (1 files):
- applsci-1453276-supplementary.pdf
