# Supplementary material for: Study of the Phenolic Compound Profile of Arbutus unedo L. Fruits at Different Ripening Stages by HPLC-TQ-MS/MS
Source: MDPI journal article supplement (doi:10.3390/app112411616), 2021-12-07
Supplement: s1 [file s1 › applsci-1453276-supplementary.pdf]

*Supplementary Material*

# **Study of the Phenolic Compound Profile of *Arbutus unedo* L. Fruits at Different Ripening Stages by HPLC-TQ-MS/MS**

**Sergio Izcara, Sonia Morante-Zarcero, Natalia Casado and Isabel Sierra\***

Department of Chemical and Environmental Technology, E.S.C.E.T, Rey Juan Carlos University, C/ Tulipán s/n, 28933, Móstoles, Madrid, Spain;  
sergio.izcara@urjc.es (S.I.); sonia.morante@urjc.es (S.M.-Z.);  
natalia.casado@urjc.es (N.C.)

\* Correspondence: isabel.sierra@urjc.es; Tel.: +34-914887018

**Keywords:** Strawberry tree fruit; phenolic compounds; ripening stages; HPLC-TQ-MS/MS analysis; antioxidant activity; total anthocyanin

## Phenolic acids

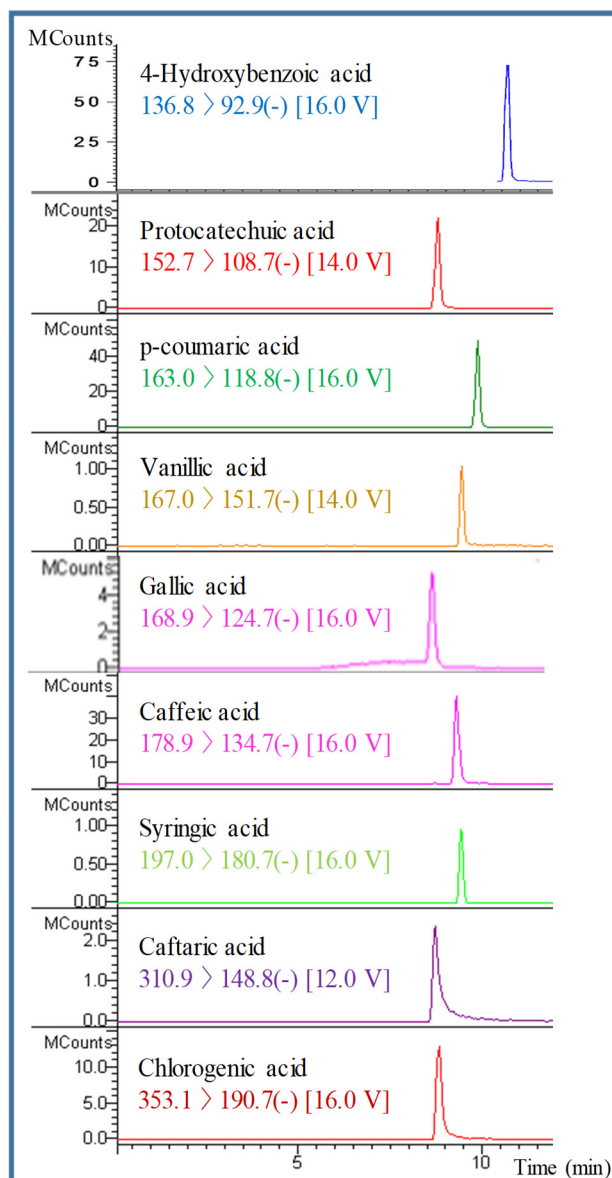

## Flavonoids

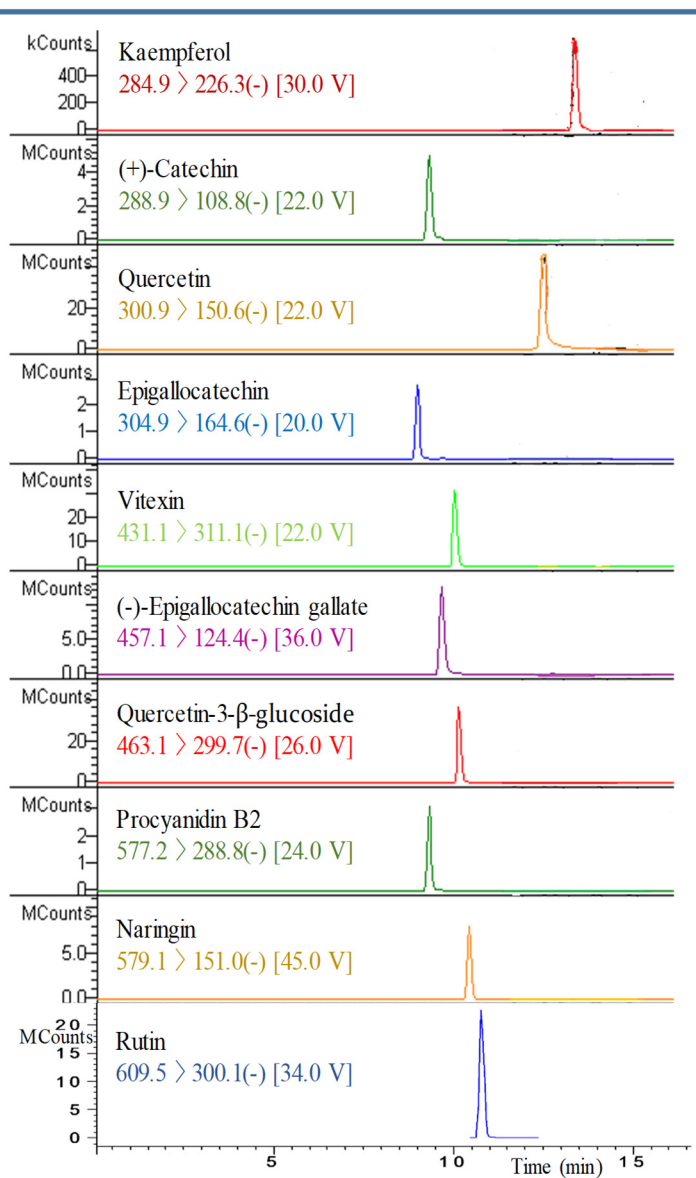

## Stilbenes

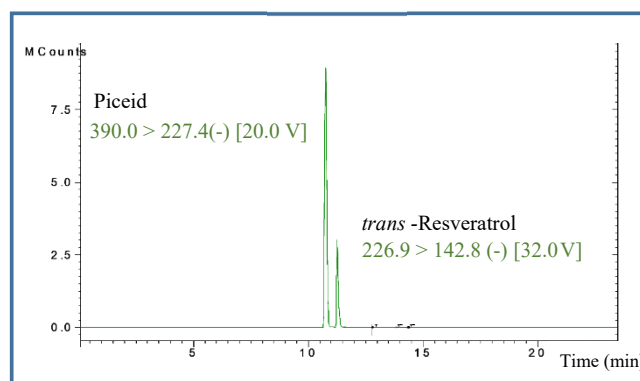

**Figure S1.** Extracted ion chromatograms for the most intense product ion of each target phenolic compound with the optimized detection and chromatographic conditions.

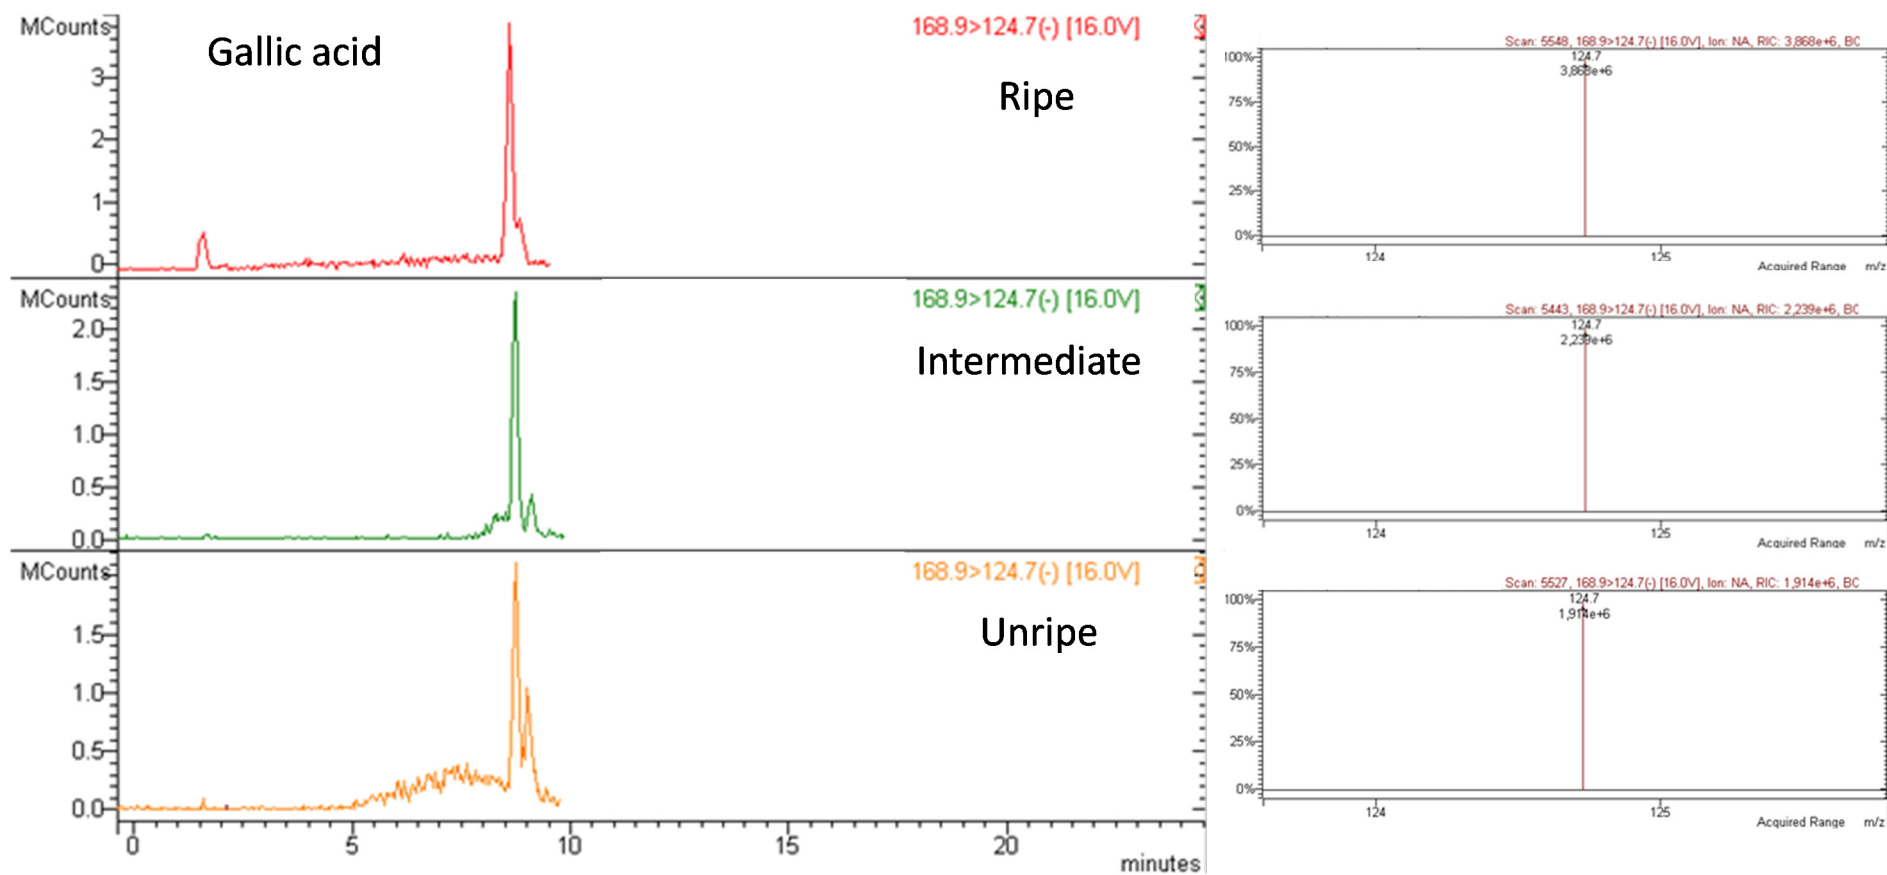

**Figure S2.** Extracted ion chromatograms for the most intense product ion and product ion spectra of gallic acid obtained in the samples extracts of *Arbutus unedo* L. berries at three ripening stages.

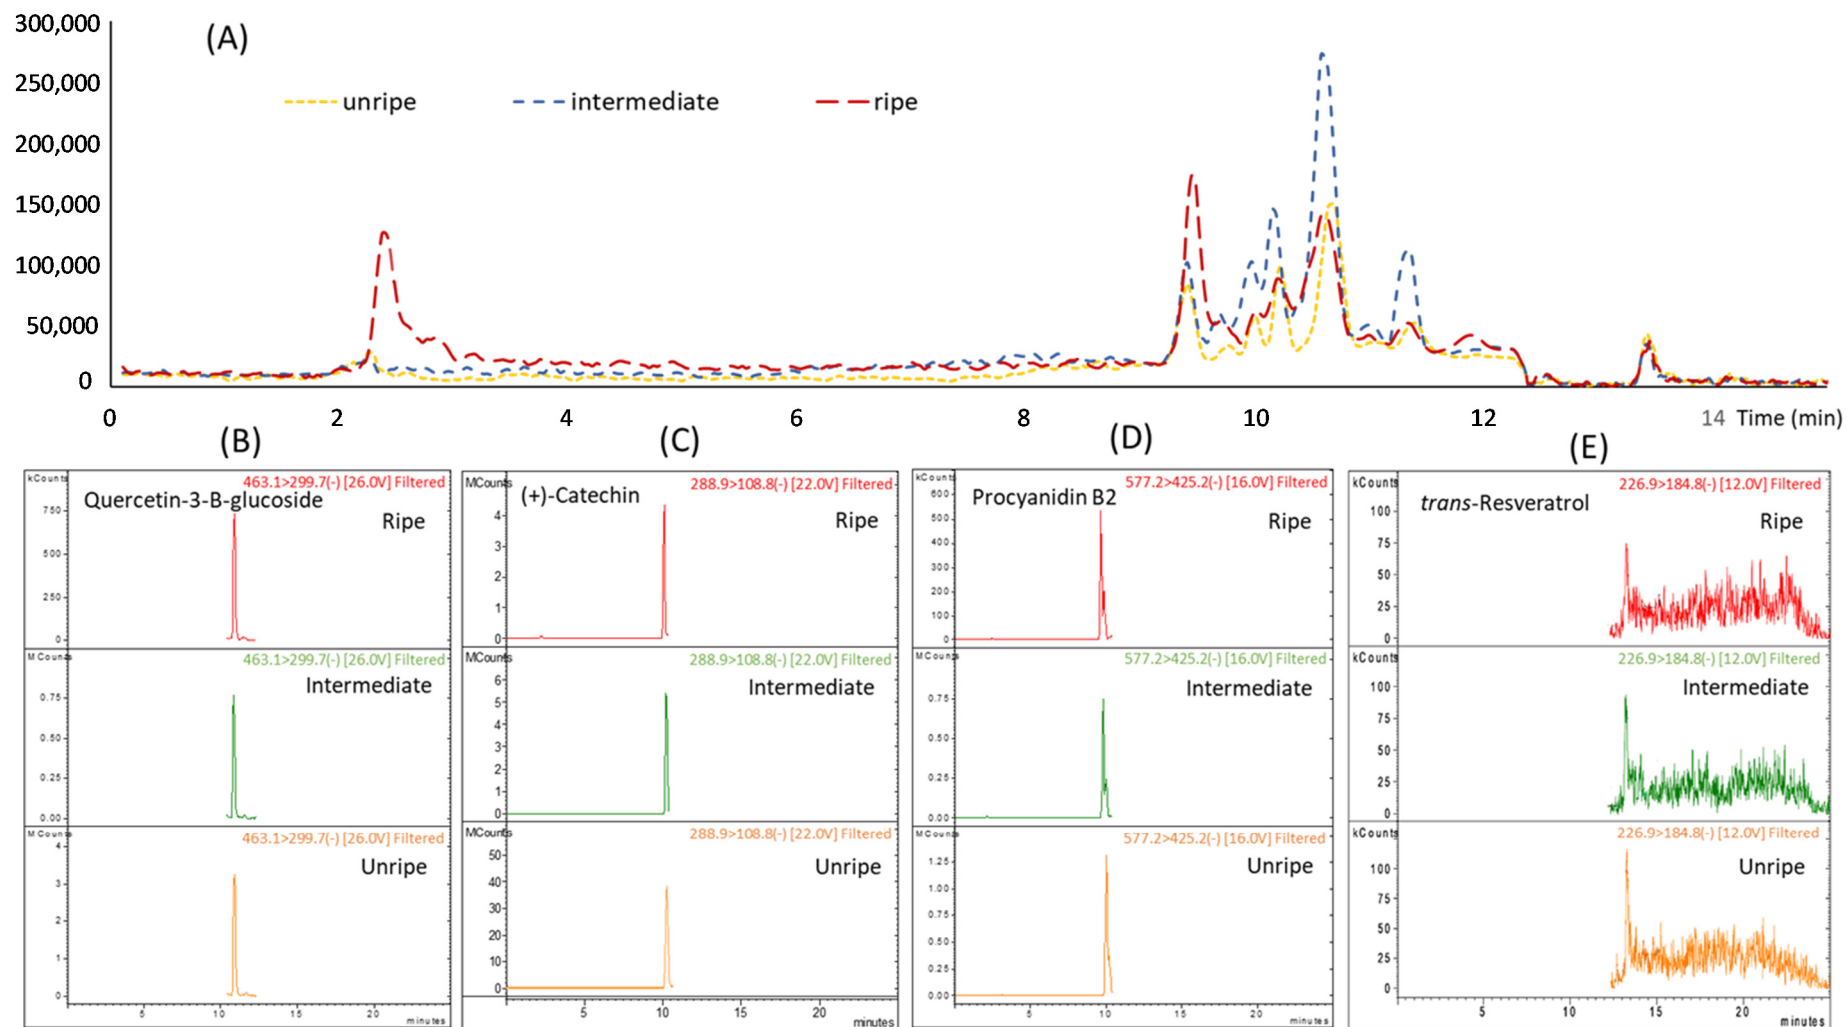

**Figure S3.** (A) Total ion chromatogram and (B) extracted ion chromatograms for the most intense product ion of quercetin-3- $\beta$ -glucoside, (C) (+)-catechin, (D) procyanidin B2 and (E) *trans*-resveratrol obtained in the samples extracts of *Arbutus unedo* L. berries at three ripening stages.
